# Supplementary material
Source: HighWire-hosted journal article supplement (http://www.jneurosci.org/highwire/filestream/598266/field_highwire_adjunct_files/0/Sup.figlegend.pdf)
Supplement: Sup.figlegend.pdf [file Sup.figlegend.pdf]

**Supplemental figure 1.** Mitochondrial membrane potential stained with DiIC<sub>1</sub>(5).

**A**, Measurement of mitochondrial membrane potential  $\Delta\Psi_m$  in isolated mitochondria by a double staining method using  $\Delta\Psi_m$ -sensitive dye, 100 nM DiIC<sub>1</sub>(5) and  $\Delta\Psi_m$ -non sensitive mitochondrial marker, 100 nM NAO. Each particle was identified as a mitochondrion based on the mitochondria-selective stain with NAO in a buffer containing 20 mM glutamate plus 2 mM malate. The emission signals of NAO were plotted on the x-axis and those of DiIC<sub>1</sub>(5) were plotted on the y-axis. Each point indicates the fluorescent intensity derived from each mitochondrion under steady-state (*control*) and treatment with 1  $\mu$ M FCCP (*+FCCP*) or 6.25  $\mu$ M Ca<sup>2+</sup> (*+Ca<sup>2+</sup>*). Most of the NAO-positive particles were determined as energized mitochondria under steady-state condition. **B**, Frequency distributions of DiIC<sub>1</sub>(5) fluorescence. Fluorescent intensities of DiIC<sub>1</sub>(5) under steady-state condition (*control*) and treatment with 6.25  $\mu$ M Ca<sup>2+</sup> (*+Ca<sup>2+</sup>*) are displayed on the x-axis. The y-axis represents the number of particles at the respective intensities. Treatment with Ca<sup>2+</sup> increased the population of depolarized mitochondria from wild-type (*WT*) and mutPOLG Tg (*Tg*) mice. **C**, Quantification of  $\Delta\Psi_m$ . The mean intensities of DiIC<sub>1</sub>(5) fluorescence were compared between wild-type (*WT*) and mutPOLG Tg (*Tg*) under steady-state condition (*control*) and treatment with Ca<sup>2+</sup> (*+Ca<sup>2+</sup>*) or FCCP (*+FCCP*) (*n* = 4 for each genotype). No significant differences were detected in the mean intensities between genotypes under any of the conditions. Data are expressed as mean  $\pm$  SEM.

**Supplemental figure 2.** Action potential-induced [Ca<sup>2+</sup>]<sub>i</sub> transient in hippocampal pyramidal neurons. **A**, Fluorescence image of a pyramidal neuron filled with bis-fura-2 in a hippocampal slice from a wild-type (*WT*) mouse. Using simultaneous whole-cell patch clamp recording with optical imaging, [Ca<sup>2+</sup>]<sub>i</sub> transients (*top and middle*) and voltage responses (*bottom*) were induced by ten action potentials (APs) at 5–100 Hz. Regions of

interest are indicated by white rectangles at the soma (*s*) and the apical dendrite (*d*) shown in the DIC image, respectively. **B**, Fluorescence image of a pyramidal neuron in a hippocampal slice from a mutPOLG Tg (*Tg*) mouse (littermate pair analyzed in *A*).  $[Ca^{2+}]_i$  transients and voltage responses were observed as well as those in *A* at the soma (*s*) and apical dendrite (*d*) shown in the DIC image. The arrangement of images is the same as that in *A*. **C**, Kinetics of  $[Ca^{2+}]_i$  transients in a rising phase by the APs ranging from 5–100 Hz. The peak amplitude and the rise time measured at the soma (*left*) and the dendrite (*right*) were compared with the neurons of wild-type (*WT*) and mutPOLG Tg (*Tg*) mice (*n* = 8). Data expressed as mean  $\pm$  SEM were plotted against firing frequency of APs.
